# Supplementary material
Source: PubMed Central journal article supplement (PMC3475606)
Supplement: NIHMS406344-supplement-Supplementary_Material_1.pdf [file NIHMS406344-supplement-Supplementary_Material_1.pdf]

# Supplemental Material 1. Robotic script for multiple serum fatty acid assays

|    |                                     |                                                                                                                                                                                                                                                         |
|----|-------------------------------------|---------------------------------------------------------------------------------------------------------------------------------------------------------------------------------------------------------------------------------------------------------|
| 1  | Comment                             | Fatty Acid Script Version 1.3 - Ready to go for infant serum from Pilot Study                                                                                                                                                                           |
| 2  | Comment                             | Modified from MySamePlsm20080402V13.esc; Pipetting has been calibrated. Applying for multiple assays of same plsm and of individual plsm after manually sampling. Add 2min to each interval between reactions                                           |
| 3  | Comment                             | Beginning of robotic FA assay from sampling                                                                                                                                                                                                             |
| 4  | User Prompt                         | "Daily maintenance; Check system liquid, tips; Pre-rinse tubing system with 40 + 5 mL system liquid;"<br>sound : no                                                                                                                                     |
| 5  | Set DiTi position                   | DiTi 1000ul<br>Grid : 2, Site : 1, Position in labware : 1                                                                                                                                                                                              |
| 6  | Move LIHA                           |   Positioning with global Z-Travel<br>Wash Station Cleaner shallow (Col. 1, Rows 1-8) |
| 7  | Comment                             | Step 1 - addition of plasma samples from Plasma Tube Carrier to Reaction Tubes; 100~200 ul plasma per tube                                                                                                                                              |
| 8  | Comment                             | Using Evo Pre-defined variable Sample_Cnt to pass the value of user defined Variable (n=184)                                                                                                                                                            |
| 9  | Set Variable                        | Number_of_Samples<br>"Enter # of Samples to Run"<br>"Enter # of Samples to Run", 1 - 184                                                                                                                                                                |
| 10 | Set Variable                        | Sample_Cnt = Number_of_Samples                                                                                                                                                                                                                          |
| 11 | Wash Tips                           |  2.0 + 1.0 ml                                                                                                                                                        |
| 12 | <input type="checkbox"/> Begin Loop | 4 times "Outer Loop Stock to HotPlate Labware"                                                                                                                                                                                                          |
| 13 | <input type="checkbox"/> Begin Loop | 3 times "Middle Loop Stock to HotPlate Columns"                                                                                                                                                                                                         |
| 14 | <input type="checkbox"/> Begin Loop | 2 times "Inner Loop Stock to HotPlate Wells"                                                                                                                                                                                                            |
| 15 | Get DiTis                           |  DiTi 1000ul                                                                                                                                                         |
| 16 | Aspirate                            |  100 µl PMP-Serum<br>"Sample Tubes Labware 1" (Col. 1, Rows 1-8)                                                                                                     |
| 17 | Dispense                            |  100 µl PMP-Serum<br>"Heating Block Labware 1" (Col. 1, Rows 1-8) , 3 options                                                                                        |
| 18 | Drop DiTis                          |  "Plasma Diti Dispose"                                                                                                                                               |
| 19 | End Loop                            | "Inner Loop Stock to HotPlate Wells"                                                                                                                                                                                                                    |
| 20 | End Loop                            | "Middle Loop Stock to HotPlate Columns"                                                                                                                                                                                                                 |
| 21 | End Loop                            | "Outer Loop Stock to HotPlate Labware"                                                                                                                                                                                                                  |

|    |                                     |                                                                                                                                                                      |
|----|-------------------------------------|----------------------------------------------------------------------------------------------------------------------------------------------------------------------|
| 22 | Wash Tips                           |  2 + 1 ml                                                                           |
| 23 | Comment                             | Step 2 - addition of Solution A ( MeOH, Tolu, IS) from Solvent Trough A to Reaction Tubes, 800 ul x 3; transmethylation starts                                       |
| 24 | Comment                             | Beginning of robotic FA assay after samples are loaded in test tubes                                                                                                 |
| 25 | Set Variable                        | Number_of_Samples<br>"Enter # of Samples to Run"<br>"Enter # of Samples to Run", 1 - 184                                                                             |
| 26 | Set Variable                        | Sample_Cnt = Number_of_Samples                                                                                                                                       |
| 27 | Wash Tips                           |  2 + 1 ml                                                                           |
| 28 | <input type="checkbox"/> Begin Loop | 4 times "Outer Loop Stock to HotPlate Labware"                                                                                                                       |
| 29 | <input type="checkbox"/> Begin Loop | 3 times "Middle Loop Stock to HotPlate Columns"                                                                                                                      |
| 30 | <input type="checkbox"/> Begin Loop | 2 times "Inner Loop Stock to HotPlate Wells"                                                                                                                         |
| 31 | Wash Tips                           |  2 + 1 ml                                                                          |
| 32 | Get DiTis                           |  DiTi 1000ul                                                                      |
| 33 | Mix                                 |  2 x 400 µl PMP-SolutionA<br>"A Trough" (Col. 1, Rows 1-8)                        |
| 34 | Aspirate                            |  800 µl PMP-SolutionA<br>"A Trough" (Col. 1, Rows 1-8)                            |
| 35 | Dispense                            |  800 µl PMP-SolutionA<br>"Heating Block Labware 1" (Col. 1, Rows 1-8) , 3 options |
| 36 | Aspirate                            |  800 µl PMP-SolutionA<br>"A Trough" (Col. 1, Rows 1-8)                            |
| 37 | Dispense                            |  800 µl PMP-SolutionA<br>"Heating Block Labware 1" (Col. 1, Rows 1-8) , 3 options |
| 38 | Aspirate                            |  800 µl PMP-SolutionA<br>"A Trough" (Col. 1, Rows 1-8)                            |
| 39 | Dispense                            |  800 µl PMP-SolutionA<br>"Heating Block Labware 1" (Col. 1, Rows 1-8) , 3 options |
| 40 | Drop DiTis                          |  "Diti Dispose"                                                                   |
| 41 | End Loop                            | "Inner Loop Stock to HotPlate Wells"                                                                                                                                 |
| 42 | End Loop                            | "Middle Loop Stock to HotPlate Columns"                                                                                                                              |

|    |                                     |                                                                                                                                                                       |
|----|-------------------------------------|-----------------------------------------------------------------------------------------------------------------------------------------------------------------------|
| 43 | End Loop                            | "Outer Loop Stock to HotPlate Labware"                                                                                                                                |
| 44 | Move LIHA                           |  Positioning with global Z-Travel<br>Wash Station Cleaner shallow (Col. 1, Rows 1-8) |
| 45 | Execute Application                 | "C:\Documents and Settings\Administrator\Desktop\TECAN SOFTWARE\EVOware1.0SP1\ComPort.exe -c2<br>-wTEMPERATURE(1,80)\r"<br>wait                                       |
| 46 | Execute Application                 | "C:\Program Files\Tecan\EVOware\ComPort.exe -c2 -wTEMPERATURE(1,80)\r"<br>wait                                                                                        |
| 47 | Comment                             | Transmethylation step: reaction starts after addition of Solution A followed by turning on heating blocks                                                             |
| 48 | Start Timer                         | 2                                                                                                                                                                     |
| 49 | Wait for Timer                      | Timer 2 : 1140 sec                                                                                                                                                    |
| 50 | Comment                             | Step 3: addition of Solution B from Solvent Trough B to Reaction Tubes; 800 ul x 6; interval 18 min;<br>transmethylation continues                                    |
| 51 | Comment                             | 1st addition of Solution B: 1 of 6                                                                                                                                    |
| 52 | Comment                             | Adding the solution in different reaction tubes on heating block; hence 3 loops are used for each addition of<br>Solution B                                           |
| 53 | Set Variable                        | Number_of_Samples<br>"Enter # of Samples to Run"<br>"Enter # of Samples to Run", 1 - 184                                                                              |
| 54 | Set Variable                        | Sample_Cnt = Number_of_Samples                                                                                                                                        |
| 55 | Wash Tips                           |  2.0 + 1.0 ml                                                                      |
| 56 | Start Timer                         | 2                                                                                                                                                                     |
| 57 | <input type="checkbox"/> Begin Loop | 4 times "Outer Loop Stock to HotPlate Labware"                                                                                                                        |
| 58 | <input type="checkbox"/> Begin Loop | 3 times "Middle Loop Stock to HotPlate Columns"                                                                                                                       |
| 59 | <input type="checkbox"/> Begin Loop | 2 times "Inner Loop Stock to HotPlate Wells"                                                                                                                          |
| 60 | Get DiTis                           |  DiTi 1000ul                                                                       |
| 61 | Mix                                 |  2 x 400 µl PMP-SolutionB<br>"B Trough" (Col. 1, Rows 1-8)                         |
| 62 | Aspirate                            |  800 µl PMP-SolutionB<br>"B Trough" (Col. 1, Rows 1-8)                             |
| 63 | Dispense                            |  800 µl PMP-SolutionB<br>"Heating Block Labware 1" (Col. 1, Rows 1-8) , 3 options  |

|    |                                     |                                                                                     |                                                                                          |
|----|-------------------------------------|-------------------------------------------------------------------------------------|------------------------------------------------------------------------------------------|
| 64 | Drop DiTis                          |    | "Diti Dispose"                                                                           |
| 65 | End Loop                            |                                                                                     | "Inner Loop Stock to HotPlate Wells"                                                     |
| 66 | End Loop                            |                                                                                     | "Middle Loop Stock to HotPlate Columns"                                                  |
| 67 | End Loop                            |                                                                                     | "Outer Loop Stock to HotPlate Labware"                                                   |
| 68 | Wash Tips                           |    | 2.0 + 1.0 ml                                                                             |
| 69 | Wait for Timer                      |                                                                                     | Timer 2 : 1200 sec                                                                       |
| 70 | Move LIHA                           |    | Positioning with global Z-Travel<br>Wash Station Cleaner shallow (Col. 1, Rows 1-8)      |
| 71 | Comment                             |                                                                                     | 2nd addition of Solution B: 2 of 6                                                       |
| 72 | Set Variable                        |                                                                                     | Number_of_Samples<br>"Enter # of Samples to Run"<br>"Enter # of Samples to Run", 1 - 184 |
| 73 | Set Variable                        |                                                                                     | Sample_Cnt = Number_of_Samples                                                           |
| 74 | Wash Tips                           |  | 2.0 + 1.0 ml                                                                             |
| 75 | Start Timer                         |                                                                                     | 2                                                                                        |
| 76 | <input type="checkbox"/> Begin Loop |                                                                                     | 4 times "Outer Loop Stock to HotPlate Labware"                                           |
| 77 | <input type="checkbox"/> Begin Loop |                                                                                     | 3 times "Middle Loop Stock to HotPlate Columns"                                          |
| 78 | <input type="checkbox"/> Begin Loop |                                                                                     | 2 times "Inner Loop Stock to HotPlate Wells"                                             |
| 79 | Get DiTis                           |  | DiTi 1000ul                                                                              |
| 80 | Mix                                 |  | 2 x 400 µl PMP-SolutionB<br>"B Trough" (Col. 1, Rows 1-8)                                |
| 81 | Aspirate                            |  | 800 µl PMP-SolutionB<br>"B Trough" (Col. 1, Rows 1-8)                                    |
| 82 | Dispense                            |  | 800 µl PMP-SolutionB<br>"Heating Block Labware 1" (Col. 1, Rows 1-8) , 3 options         |
| 83 | Drop DiTis                          |  | "Diti Dispose"                                                                           |
| 84 | End Loop                            |                                                                                     | "Inner Loop Stock to HotPlate Wells"                                                     |

|     |                                     |                                                                                                                                                                                                                                                          |
|-----|-------------------------------------|----------------------------------------------------------------------------------------------------------------------------------------------------------------------------------------------------------------------------------------------------------|
| 85  | End Loop                            | "Middle Loop Stock to HotPlate Columns"                                                                                                                                                                                                                  |
| 86  | End Loop                            | "Outer Loop Stock to HotPlate Labware"                                                                                                                                                                                                                   |
| 87  | Wash Tips                           |  2.0 + 1.0 ml                                                                                                                                                           |
| 88  | Move LIHA                           |   Positioning with global Z-Travel<br>Wash Station Cleaner shallow (Col. 1, Rows 1-8)  |
| 89  | Wait for Timer                      | Timer 2 : 1200 sec                                                                                                                                                                                                                                       |
| 90  | Comment                             | 3rd addition of Solution B: 3 of 6                                                                                                                                                                                                                       |
| 91  | Set Variable                        | Number_of_Samples<br>"Enter # of Samples to Run"<br>"Enter # of Samples to Run", 1 - 184                                                                                                                                                                 |
| 92  | Set Variable                        | Sample_Cnt = Number_of_Samples                                                                                                                                                                                                                           |
| 93  | Wash Tips                           |  2.0 + 1.0 ml                                                                                                                                                           |
| 94  | Start Timer                         | 2                                                                                                                                                                                                                                                        |
| 95  | <input type="checkbox"/> Begin Loop | 4 times "Outer Loop Stock to HotPlate Labware"                                                                                                                                                                                                           |
| 96  | <input type="checkbox"/> Begin Loop | 3 times "Middle Loop Stock to HotPlate Columns"                                                                                                                                                                                                          |
| 97  | <input type="checkbox"/> Begin Loop | 2 times "Inner Loop Stock to HotPlate Wells"                                                                                                                                                                                                             |
| 98  | Get DiTis                           |  DiTi 1000ul                                                                                                                                                          |
| 99  | Mix                                 |   2 x 400 µl PMP-SolutionB<br>"B Trough" (Col. 1, Rows 1-8)                        |
| 100 | Aspirate                            |   800 µl PMP-SolutionB<br>"B Trough" (Col. 1, Rows 1-8)                            |
| 101 | Dispense                            |   800 µl PMP-SolutionB<br>"Heating Block Labware 1" (Col. 1, Rows 1-8) , 3 options |
| 102 | Drop DiTis                          |  "Diti Dispose"                                                                                                                                                       |
| 103 | End Loop                            | "Inner Loop Stock to HotPlate Wells"                                                                                                                                                                                                                     |
| 104 | End Loop                            | "Middle Loop Stock to HotPlate Columns"                                                                                                                                                                                                                  |
| 105 | End Loop                            | "Outer Loop Stock to HotPlate Labware"                                                                                                                                                                                                                   |

|     |                |                                                                                         |                                                                                          |
|-----|----------------|-----------------------------------------------------------------------------------------|------------------------------------------------------------------------------------------|
| 106 | Wash Tips      |  1-8   | 2.0 + 1.0 ml                                                                             |
| 107 | Move LIHA      |  1-8   | Positioning with global Z-Travel<br>Wash Station Cleaner shallow (Col. 1, Rows 1-8)      |
| 108 | Wait for Timer |                                                                                         | Timer 2 : 1200 sec                                                                       |
| 109 | Comment        |                                                                                         | 4th addition of Solution B: 4 of 6                                                       |
| 110 | Set Variable   |                                                                                         | Number_of_Samples<br>"Enter # of Samples to Run"<br>"Enter # of Samples to Run", 1 - 184 |
| 111 | Set Variable   |                                                                                         | Sample_Cnt = Number_of_Samples                                                           |
| 112 | Wash Tips      |  1-8   | 2.0 + 1.0 ml                                                                             |
| 113 | Start Timer    |                                                                                         | 2                                                                                        |
| 114 | Begin Loop     |                                                                                         | 4 times "Outer Loop Stock to HotPlate Labware"                                           |
| 115 | Begin Loop     |                                                                                         | 3 times "Middle Loop Stock to HotPlate Columns"                                          |
| 116 | Begin Loop     |                                                                                         | 2 times "Inner Loop Stock to HotPlate Wells"                                             |
| 117 | Get DiTis      |  1-8 | DiTi 1000ul                                                                              |
| 118 | Mix            |  1-8 | 2 x 400 µl PMP-SolutionB<br>"B Trough" (Col. 1, Rows 1-8)                                |
| 119 | Aspirate       |  1-8 | 800 µl PMP-SolutionB<br>"B Trough" (Col. 1, Rows 1-8)                                    |
| 120 | Dispense       |  1-8 | 800 µl PMP-SolutionB<br>"Heating Block Labware 1" (Col. 1, Rows 1-8) , 3 options         |
| 121 | Drop DiTis     |  1-8 | "Diti Dispose"                                                                           |
| 122 | End Loop       |                                                                                         | "Inner Loop Stock to HotPlate Wells"                                                     |
| 123 | End Loop       |                                                                                         | "Middle Loop Stock to HotPlate Columns"                                                  |
| 124 | End Loop       |                                                                                         | "Outer Loop Stock to HotPlate Labware"                                                   |
| 125 | Wash Tips      |  1-8 | 2.0 + 1.0 ml                                                                             |
| 126 | Wait for Timer |                                                                                         | Timer 2 : 1200 sec                                                                       |

|     |                |                                                                                                                                                                         |
|-----|----------------|-------------------------------------------------------------------------------------------------------------------------------------------------------------------------|
| 127 | Comment        | 5th addition of Solution B: 5 of 6                                                                                                                                      |
| 128 | Set Variable   | Number_of_Samples<br>"Enter # of Samples to Run"<br>"Enter # of Samples to Run", 1 - 184                                                                                |
| 129 | Set Variable   | Sample_Cnt = Number_of_Samples                                                                                                                                          |
| 130 | Wash Tips      |  2.0 + 1.0 ml                                                                          |
| 131 | Start Timer    | 2                                                                                                                                                                       |
| 132 | Begin Loop     | 4 times "Outer Loop Stock to HotPlate Labware"                                                                                                                          |
| 133 | Begin Loop     | 3 times "Middle Loop Stock to HotPlate Columns"                                                                                                                         |
| 134 | Begin Loop     | 2 times "Inner Loop Stock to HotPlate Wells"                                                                                                                            |
| 135 | Get DiTis      |  DiTi 1000ul                                                                           |
| 136 | Mix            |  2 x 400 µl PMP-SolutionB<br>"B Trough" (Col. 1, Rows 1-8)                            |
| 137 | Aspirate       |  800 µl PMP-SolutionB<br>"B Trough" (Col. 1, Rows 1-8)                               |
| 138 | Dispense       |  800 µl PMP-SolutionB<br>"Heating Block Labware 1" (Col. 1, Rows 1-8) , 3 options    |
| 139 | Drop DiTis     |  "Diti Dispose"                                                                      |
| 140 | End Loop       | "Inner Loop Stock to HotPlate Wells"                                                                                                                                    |
| 141 | End Loop       | "Middle Loop Stock to HotPlate Columns"                                                                                                                                 |
| 142 | End Loop       | "Outer Loop Stock to HotPlate Labware"                                                                                                                                  |
| 143 | Wash Tips      |  2.0 + 1.0 ml                                                                        |
| 144 | Move LIHA      |  Positioning with global Z-Travel<br>Wash Station Cleaner shallow (Col. 1, Rows 1-8) |
| 145 | Wait for Timer | Timer 2 : 1200 sec                                                                                                                                                      |
| 146 | Comment        | 6th addition of Solution B: 6 of 6                                                                                                                                      |
| 147 | Set Variable   | Number_of_Samples<br>"Enter # of Samples to Run"<br>"Enter # of Samples to Run", 1 - 184                                                                                |

|     |                                     |                                                                                                                                                                                                                                                             |
|-----|-------------------------------------|-------------------------------------------------------------------------------------------------------------------------------------------------------------------------------------------------------------------------------------------------------------|
| 148 | Set Variable                        | Sample_Cnt = Number_of_Samples                                                                                                                                                                                                                              |
| 149 | Wash Tips                           |  2.0 + 1.0 ml                                                                                                                                                              |
| 150 | Start Timer                         | 2                                                                                                                                                                                                                                                           |
| 151 | <input type="checkbox"/> Begin Loop | 4 times "Outer Loop Stock to HotPlate Labware"                                                                                                                                                                                                              |
| 152 | <input type="checkbox"/> Begin Loop | 3 times "Middle Loop Stock to HotPlate Columns"                                                                                                                                                                                                             |
| 153 | <input type="checkbox"/> Begin Loop | 2 times "Inner Loop Stock to HotPlate Wells"                                                                                                                                                                                                                |
| 154 | Get DiTis                           |  DiTi 1000ul                                                                                                                                                               |
| 155 | Mix                                 |   2 x 400 µl PMP-SolutionB<br>"B Trough" (Col. 1, Rows 1-8)                               |
| 156 | Aspirate                            |   800 µl PMP-SolutionB<br>"B Trough" (Col. 1, Rows 1-8)                                   |
| 157 | Dispense                            |   800 µl PMP-SolutionB<br>"Heating Block Labware 1" (Col. 1, Rows 1-8) , 3 options        |
| 158 | Drop DiTis                          |  "Diti Dispose"                                                                                                                                                          |
| 159 | End Loop                            | "Inner Loop Stock to HotPlate Wells"                                                                                                                                                                                                                        |
| 160 | End Loop                            | "Middle Loop Stock to HotPlate Columns"                                                                                                                                                                                                                     |
| 161 | End Loop                            | "Outer Loop Stock to HotPlate Labware"                                                                                                                                                                                                                      |
| 162 | Wash Tips                           |  2.0 + 1.0 ml                                                                                                                                                            |
| 163 | Wait for Timer                      | Timer 2 : 1800 sec                                                                                                                                                                                                                                          |
| 164 | Move LIHA                           |   Positioning with global Z-Travel<br>Wash Station Cleaner shallow (Col. 1, Rows 1-8) |
| 165 | Comment                             | Step 4: addition of Solution C ( w/o aceChlor) from Solvent Trough C to Reaction Tubes; 800 ul x 2; interval 28 min                                                                                                                                         |
| 166 | Comment                             | 1st addition of Solution C: 1 of 2                                                                                                                                                                                                                          |
| 167 | Set Variable                        | Number_of_Samples<br>"Enter # of Samples to Run"<br>"Enter # of Samples to Run", 1 - 184                                                                                                                                                                    |
| 168 | Set Variable                        | Sample_Cnt = Number_of_Samples                                                                                                                                                                                                                              |



|     |                     |                                                                                                                                 |                                                                                  |
|-----|---------------------|---------------------------------------------------------------------------------------------------------------------------------|----------------------------------------------------------------------------------|
| 169 | Wash Tips           |  1-8                                           | 2.0 + 1.0 ml                                                                     |
| 170 | Start Timer         | 2                                                                                                                               |                                                                                  |
| 171 | Begin Loop          | 4 times "Outer Loop Stock to HotPlate Labware"                                                                                  |                                                                                  |
| 172 | Begin Loop          | 3 times "Middle Loop Stock to HotPlate Columns"                                                                                 |                                                                                  |
| 173 | Begin Loop          | 2 times "Inner Loop Stock to HotPlate Wells"                                                                                    |                                                                                  |
| 174 | Get DiTis           |  1-8                                           | DiTi 1000ul                                                                      |
| 175 | Mix                 |  1-8                                           | 2 x 400 µl PMP-SolutionC<br>"C Trough" (Col. 1, Rows 1-8)                        |
| 176 | Aspirate            |  1-8                                           | 800 µl PMP-SolutionC<br>"C Trough" (Col. 1, Rows 1-8)                            |
| 177 | Dispense            |  1-8                                           | 800 µl PMP-SolutionC<br>"Heating Block Labware 1" (Col. 1, Rows 1-8) , 3 options |
| 178 | Drop DiTis          |  1-8                                          | "Diti Dispose"                                                                   |
| 179 | End Loop            | "Inner Loop Stock to HotPlate Wells"                                                                                            |                                                                                  |
| 180 | End Loop            | "Middle Loop Stock to HotPlate Columns"                                                                                         |                                                                                  |
| 181 | End Loop            | "Outer Loop Stock to HotPlate Labware"                                                                                          |                                                                                  |
| 182 | Wash Tips           |  1-8                                         | 2.0 + 1.0 ml                                                                     |
| 183 | Wait for Timer      | Timer 2 : 1800 sec                                                                                                              |                                                                                  |
| 184 | Execute Application | "C:\Documents and Settings\Administrator\Desktop\TECAN SOFTWARE\EVOware1.0SP1\ComPort.exe -c2<br>-wTEMPERATURE(1,24)\r"<br>wait |                                                                                  |
| 185 | Execute Application | "C:\Program Files\Tecan\EVOware\ComPort.exe -c2 -wTEMPERATURE(1,24)\r"<br>wait                                                  |                                                                                  |
| 186 | Start Timer         | 3                                                                                                                               |                                                                                  |
| 187 | Wait for Timer      | Timer 3 : 10 sec                                                                                                                |                                                                                  |
| 188 | Comment             | 2nd addition of Solution C (add after cooling Heater Block): 2 of 2                                                             |                                                                                  |
|     | Set Variable        | Number_of_Samples<br>"Enter # of Samples to Run"<br>"Enter # of Samples to Run", 1 - 184                                        |                                                                                  |

|     |                                     |                                                                                                                                                                                                                                                      |
|-----|-------------------------------------|------------------------------------------------------------------------------------------------------------------------------------------------------------------------------------------------------------------------------------------------------|
| 190 | Set Variable                        | Sample_Cnt = Number_of_Samples                                                                                                                                                                                                                       |
| 191 | Wash Tips                           |  2.0 + 1.0 ml                                                                                                                                                       |
| 192 | Start Timer                         | 4                                                                                                                                                                                                                                                    |
| 193 | <input type="checkbox"/> Begin Loop | 4 times "Outer Loop Stock to HotPlate Labware"                                                                                                                                                                                                       |
| 194 | <input type="checkbox"/> Begin Loop | 3 times "Middle Loop Stock to HotPlate Columns"                                                                                                                                                                                                      |
| 195 | <input type="checkbox"/> Begin Loop | 2 times "Inner Loop Stock to HotPlate Wells"                                                                                                                                                                                                         |
| 196 | Get DiTis                           |  DiTi 1000ul                                                                                                                                                        |
| 197 | Mix                                 |   2 x 400 µl PMP-SolutionC<br>"C Trough" (Col. 1, Rows 1-8)                        |
| 198 | Aspirate                            |   800 µl PMP-SolutionC<br>"C Trough" (Col. 1, Rows 1-8)                            |
| 199 | Dispense                            |   800 µl PMP-SolutionC<br>"Heating Block Labware 1" (Col. 1, Rows 1-8) , 3 options |
| 200 | Drop DiTis                          |  "Diti Dispose"                                                                                                                                                   |
| 201 | End Loop                            | "Inner Loop Stock to HotPlate Wells"                                                                                                                                                                                                                 |
| 202 | End Loop                            | "Middle Loop Stock to HotPlate Columns"                                                                                                                                                                                                              |
| 203 | End Loop                            | "Outer Loop Stock to HotPlate Labware"                                                                                                                                                                                                               |
| 204 | Wash Tips                           |  2.0 + 1.0 ml                                                                                                                                                     |
| 205 | Wait for Timer                      | Timer 4 : 2100 sec                                                                                                                                                                                                                                   |
| 206 | Comment                             | Waiting for 35 min for the cooling of reaction heat block                                                                                                                                                                                            |
| 207 | Comment                             | Step 5: addition of Solution D ( Decane/Pentane) from Solvent Trough D to Reaction Tubes; 800 ul x 1;<br>extract FAME                                                                                                                                |
| 208 | Set Variable                        | Number_of_Samples<br>"Enter # of Samples to Run"<br>"Enter # of Samples to Run", 1 - 184                                                                                                                                                             |
| 209 | Set Variable                        | Sample_Cnt = Number_of_Samples                                                                                                                                                                                                                       |
| 210 | Wash Tips                           |  2.0 + 1.0 ml                                                                                                                                                     |

|     |                |                                                                                                                                                                    |
|-----|----------------|--------------------------------------------------------------------------------------------------------------------------------------------------------------------|
| 211 | Begin Loop     | 4 times "Outer Loop Stock to HotPlate Labware"                                                                                                                     |
| 212 | Begin Loop     | 3 times "Middle Loop Stock to HotPlate Columns"                                                                                                                    |
| 213 | Begin Loop     | 2 times "Inner Loop Stock to HotPlate Wells"                                                                                                                       |
| 214 | Get DiTis      |  DiTi 1000ul                                                                      |
| 215 | Mix            |  3 x 400 µl PMP-SolutionD<br>"D Trough" (Col. 1, Rows 1-8)                        |
| 216 | Aspirate       |  800 µl PMP-SolutionD<br>"D Trough" (Col. 1, Rows 1-8)                            |
| 217 | Dispense       |  800 µl PMP-SolutionD<br>"Heating Block Labware 1" (Col. 1, Rows 1-8) , 3 options |
| 218 | Drop DiTis     |  "Diti Dispose"                                                                   |
| 219 | End Loop       | "Inner Loop Stock to HotPlate Wells"                                                                                                                               |
| 220 | End Loop       | "Middle Loop Stock to HotPlate Columns"                                                                                                                            |
| 221 | End Loop       | "Outer Loop Stock to HotPlate Labware"                                                                                                                             |
| 222 | Wash Tips      |  2.0 + 1.0 ml                                                                   |
| 223 | Start Timer    | 1                                                                                                                                                                  |
| 224 | Wait for Timer | Timer 1 : 10 sec                                                                                                                                                   |
| 225 | Comment        | Step 6: extraction of FAME w/ Solution D (Decane/Pentane); 400ul x 25 times of aspirate/dispense.                                                                  |
| 226 | Set Variable   | Number_of_Samples<br>"Enter # of Samples to Run"<br>"Enter # of Samples to Run", 1 - 184                                                                           |
| 227 | Set Variable   | Sample_Cnt = Number_of_Samples                                                                                                                                     |
| 228 | Begin Loop     | 4 times "Outer Loop Vary Labware for FA Extraction"                                                                                                                |
| 229 | Begin Loop     | 3 times "Middle Loop Vary Column for FA Extraction"                                                                                                                |
| 230 | Begin Loop     | 2 times "Inner Loop Vary 8 Wells for FA Extraction"                                                                                                                |
| 231 | Wash Tips      |  2.0 + 1.0 ml                                                                   |

|     |                |                                                                                     |                                                                                   |
|-----|----------------|-------------------------------------------------------------------------------------|-----------------------------------------------------------------------------------|
| 232 | Get DiTis      |    | DiTi 1000ul                                                                       |
| 233 | Command        | "C5T360,-5000"                                                                      |                                                                                   |
| 234 | Aspirate       |    | 400 µl PMP-Extraction<br>"Heating Block Labware 1" (Col. 1, Rows 1-8) , 3 options |
| 235 | Dispense       |    | 400 µl PMP-Extraction<br>"Heating Block Labware 1" (Col. 1, Rows 1-8) , 3 options |
| 236 | Aspirate       |    | 400 µl PMP-Extraction<br>"Heating Block Labware 1" (Col. 1, Rows 1-8) , 3 options |
| 237 | Dispense       |    | 400 µl PMP-Extraction<br>"Heating Block Labware 1" (Col. 1, Rows 1-8) , 3 options |
| 238 | Aspirate       |    | 400 µl PMP-Extraction<br>"Heating Block Labware 1" (Col. 1, Rows 1-8) , 3 options |
| 239 | Dispense       |    | 400 µl PMP-Extraction<br>"Heating Block Labware 1" (Col. 1, Rows 1-8) , 3 options |
| 240 | Aspirate       |    | 400 µl PMP-Extraction<br>"Heating Block Labware 1" (Col. 1, Rows 1-8) , 3 options |
| 241 | Dispense       |    | 400 µl PMP-Extraction<br>"Heating Block Labware 1" (Col. 1, Rows 1-8) , 3 options |
| 242 | Aspirate       |  | 400 µl PMP-Extraction<br>"Heating Block Labware 1" (Col. 1, Rows 1-8) , 3 options |
| 243 | Dispense       |  | 400 µl PMP-Extraction<br>"Heating Block Labware 1" (Col. 1, Rows 1-8) , 3 options |
| 244 | Start Timer    | 4                                                                                   |                                                                                   |
| 245 | Wait for Timer | Timer 4 : 10 sec                                                                    |                                                                                   |
| 246 | Aspirate       |  | 400 µl PMP-Extraction<br>"Heating Block Labware 1" (Col. 1, Rows 1-8) , 3 options |
| 247 | Dispense       |  | 400 µl PMP-Extraction<br>"Heating Block Labware 1" (Col. 1, Rows 1-8) , 3 options |
| 248 | Aspirate       |  | 400 µl PMP-Extraction<br>"Heating Block Labware 1" (Col. 1, Rows 1-8) , 3 options |
| 249 | Dispense       |  | 400 µl PMP-Extraction<br>"Heating Block Labware 1" (Col. 1, Rows 1-8) , 3 options |
| 250 | Aspirate       |  | 400 µl PMP-Extraction<br>"Heating Block Labware 1" (Col. 1, Rows 1-8) , 3 options |
| 251 | Dispense       |  | 400 µl PMP-Extraction<br>"Heating Block Labware 1" (Col. 1, Rows 1-8) , 3 options |
| 252 | Aspirate       |  | 400 µl PMP-Extraction<br>"Heating Block Labware 1" (Col. 1, Rows 1-8) , 3 options |
| 253 | Dispense       |  | 400 µl PMP-Extraction<br>"Heating Block Labware 1" (Col. 1, Rows 1-8) , 3 options |

|     |                |                                                                                     |                                                                                     |                                                                                   |
|-----|----------------|-------------------------------------------------------------------------------------|-------------------------------------------------------------------------------------|-----------------------------------------------------------------------------------|
| 254 | Aspirate       |    |    | 400 µl PMP-Extraction<br>"Heating Block Labware 1" (Col. 1, Rows 1-8) , 3 options |
| 255 | Dispense       |    |    | 400 µl PMP-Extraction<br>"Heating Block Labware 1" (Col. 1, Rows 1-8) , 3 options |
| 256 | Start Timer    |                                                                                     | 4                                                                                   |                                                                                   |
| 257 | Drop DiTis     |    |                                                                                     | "Diti Dispose"                                                                    |
| 258 | Wash Tips      |    |                                                                                     | 4 + 2 ml                                                                          |
| 259 | Get DiTis      |    |                                                                                     | DiTi 1000ul                                                                       |
| 260 | Wait for Timer |                                                                                     |                                                                                     | Timer 4 : 10 sec                                                                  |
| 261 | Aspirate       |    |    | 400 µl PMP-Extraction<br>"Heating Block Labware 1" (Col. 1, Rows 1-8) , 3 options |
| 262 | Dispense       |    |    | 400 µl PMP-Extraction<br>"Heating Block Labware 1" (Col. 1, Rows 1-8) , 3 options |
| 263 | Aspirate       |    |    | 400 µl PMP-Extraction<br>"Heating Block Labware 1" (Col. 1, Rows 1-8) , 3 options |
| 264 | Dispense       |  |   | 400 µl PMP-Extraction<br>"Heating Block Labware 1" (Col. 1, Rows 1-8) , 3 options |
| 265 | Aspirate       |  |  | 400 µl PMP-Extraction<br>"Heating Block Labware 1" (Col. 1, Rows 1-8) , 3 options |
| 266 | Dispense       |  |  | 400 µl PMP-Extraction<br>"Heating Block Labware 1" (Col. 1, Rows 1-8) , 3 options |
| 267 | Aspirate       |  |  | 400 µl PMP-Extraction<br>"Heating Block Labware 1" (Col. 1, Rows 1-8) , 3 options |
| 268 | Dispense       |  |  | 400 µl PMP-Extraction<br>"Heating Block Labware 1" (Col. 1, Rows 1-8) , 3 options |
| 269 | Aspirate       |  |  | 400 µl PMP-Extraction<br>"Heating Block Labware 1" (Col. 1, Rows 1-8) , 3 options |
| 270 | Dispense       |  |  | 400 µl PMP-Extraction<br>"Heating Block Labware 1" (Col. 1, Rows 1-8) , 3 options |
| 271 | Start Timer    |                                                                                     | 4                                                                                   |                                                                                   |
| 272 | Wait for Timer |                                                                                     |                                                                                     | Timer 4 : 10 sec                                                                  |
| 273 | Aspirate       |  |  | 400 µl PMP-Extraction<br>"Heating Block Labware 1" (Col. 1, Rows 1-8) , 3 options |
| 274 | Dispense       |  |  | 400 µl PMP-Extraction<br>"Heating Block Labware 1" (Col. 1, Rows 1-8) , 3 options |
| 275 | Aspirate       |  |  | 400 µl PMP-Extraction<br>"Heating Block Labware 1" (Col. 1, Rows 1-8) , 3 options |

|     |                |                                                                                     |                                                                                     |                                                                                   |
|-----|----------------|-------------------------------------------------------------------------------------|-------------------------------------------------------------------------------------|-----------------------------------------------------------------------------------|
| 276 | Dispense       |    |    | 400 µl PMP-Extraction<br>"Heating Block Labware 1" (Col. 1, Rows 1-8) , 3 options |
| 277 | Aspirate       |    |    | 400 µl PMP-Extraction<br>"Heating Block Labware 1" (Col. 1, Rows 1-8) , 3 options |
| 278 | Dispense       |    |    | 400 µl PMP-Extraction<br>"Heating Block Labware 1" (Col. 1, Rows 1-8) , 3 options |
| 279 | Aspirate       |    |    | 400 µl PMP-Extraction<br>"Heating Block Labware 1" (Col. 1, Rows 1-8) , 3 options |
| 280 | Dispense       |    |    | 400 µl PMP-Extraction<br>"Heating Block Labware 1" (Col. 1, Rows 1-8) , 3 options |
| 281 | Aspirate       |    |    | 400 µl PMP-Extraction<br>"Heating Block Labware 1" (Col. 1, Rows 1-8) , 3 options |
| 282 | Dispense       |    |    | 400 µl PMP-Extraction<br>"Heating Block Labware 1" (Col. 1, Rows 1-8) , 3 options |
| 283 | Start Timer    | 4                                                                                   |                                                                                     |                                                                                   |
| 284 | Drop DiTis     |    |                                                                                     | "Diti Dispose"                                                                    |
| 285 | Wash Tips      |    |                                                                                     | 4 + 2 ml                                                                          |
| 286 | Get DiTis      |  |                                                                                     | DiTi 1000ul                                                                       |
| 287 | Wait for Timer | Timer 4 : 10 sec                                                                    |                                                                                     |                                                                                   |
| 288 | Aspirate       |  |  | 400 µl PMP-Extraction<br>"Heating Block Labware 1" (Col. 1, Rows 1-8) , 3 options |
| 289 | Dispense       |  |  | 400 µl PMP-Extraction<br>"Heating Block Labware 1" (Col. 1, Rows 1-8) , 3 options |
| 290 | Aspirate       |  |  | 400 µl PMP-Extraction<br>"Heating Block Labware 1" (Col. 1, Rows 1-8) , 3 options |
| 291 | Dispense       |  |  | 400 µl PMP-Extraction<br>"Heating Block Labware 1" (Col. 1, Rows 1-8) , 3 options |
| 292 | Aspirate       |  |  | 400 µl PMP-Extraction<br>"Heating Block Labware 1" (Col. 1, Rows 1-8) , 3 options |
| 293 | Dispense       |  |  | 400 µl PMP-Extraction<br>"Heating Block Labware 1" (Col. 1, Rows 1-8) , 3 options |
| 294 | Aspirate       |  |  | 400 µl PMP-Extraction<br>"Heating Block Labware 1" (Col. 1, Rows 1-8) , 3 options |
| 295 | Dispense       |  |  | 400 µl PMP-Extraction<br>"Heating Block Labware 1" (Col. 1, Rows 1-8) , 3 options |
| 296 | Aspirate       |  |  | 400 µl PMP-Extraction<br>"Heating Block Labware 1" (Col. 1, Rows 1-8) , 3 options |
| 297 | Dispense       |  |  | 400 µl PMP-Extraction<br>"Heating Block Labware 1" (Col. 1, Rows 1-8) , 3 options |

|     |                                     |                                                                                     |                                                                                                                              |
|-----|-------------------------------------|-------------------------------------------------------------------------------------|------------------------------------------------------------------------------------------------------------------------------|
| 298 | Drop DiTis                          |    | "Diti Dispose"                                                                                                               |
| 299 | End Loop                            |                                                                                     | "Inner Loop Vary 8 Wells for FA Extraction"                                                                                  |
| 300 | End Loop                            |                                                                                     | "Middle Loop Vary Column for FA Extraction"                                                                                  |
| 301 | End Loop                            |                                                                                     | "Outer Loop Vary Labware for FA Extraction"                                                                                  |
| 302 | Wash Tips                           |    | 8 + 4 ml                                                                                                                     |
| 303 | Comment                             |                                                                                     | Step 7: transfer of top layer contained FAME to GC vials                                                                     |
| 304 | Execute Application                 |                                                                                     | "C:\Documents and Settings\Administrator\Desktop\TECAN SOFTWARE\EVOware1.0SP1\ComPort.exe -c2 -wTEMPERATURE(2,55)\r"<br>wait |
| 305 | Execute Application                 |                                                                                     | "C:\Program Files\Tecan\EVOware\ComPort.exe -c2 -wTEMPERATURE(2,55)\r"<br>wait                                               |
| 306 | Set Variable                        |                                                                                     | Number_of_Samples<br>"Enter # of Samples to Run"<br>"Enter # of Samples to Run", 1 - 184                                     |
| 307 | Set Variable                        |                                                                                     | Sample_Cnt = Number_of_Samples                                                                                               |
| 308 | <input type="checkbox"/> Begin Loop |                                                                                     | 4 times "Out loop for hexane transfer"                                                                                       |
| 309 | <input type="checkbox"/> Begin Loop |                                                                                     | 3 times "Middle loop for hexane transfer"                                                                                    |
| 310 | <input type="checkbox"/> Begin Loop |                                                                                     | 2 times "Inner loop vary 8 wells for hexane transfer"                                                                        |
| 311 | Wash Tips                           |  | 2.0 + 1.0 ml                                                                                                                 |
| 312 | Get DiTis                           |  | DiTi 1000ul                                                                                                                  |
| 313 | Mix                                 |  | 3 x 250 µl PMP-SolutionD<br>"D Trough" (Col. 1, Rows 1-8)                                                                    |
| 314 | Aspirate                            |  | 250 µl PMP-FAME<br>"Heating Block Labware 1" (Col. 1, Rows 1-8) , 3 options                                                  |
| 315 | Dispense                            |  | 250 µl PMP-FAME<br>"GC Vials" (Col. 1, Rows 1-8) , 3 options                                                                 |
| 316 | Drop DiTis                          |  | "Diti Dispose"                                                                                                               |
| 317 | End Loop                            |                                                                                     | "Inner loop vary 8 wells for hexane transfer"                                                                                |
| 318 | End Loop                            |                                                                                     | "Middle loop for hexane transfer"                                                                                            |

|     |                     |                                                                                                                                 |
|-----|---------------------|---------------------------------------------------------------------------------------------------------------------------------|
| 319 | End Loop            | "Out loop for hexane transfer"                                                                                                  |
| 320 | Wash Tips           |  8 + 4 ml                                      |
| 321 | Comment             | Step 8 (Final): concentration of decane/pentane contained FAME                                                                  |
| 322 | Start Timer         | 5                                                                                                                               |
| 323 | Wait for Timer      | Timer 5 : 4200 sec                                                                                                              |
| 324 | Execute Application | "C:\Documents and Settings\Administrator\Desktop\TECAN SOFTWARE\EVOware1.0SP1\ComPort.exe -c2<br>-wTEMPERATURE(2,24)\r"<br>wait |
| 325 | Execute Application | "C:\Program Files\Tecan\EVOware\ComPort.exe -c2 -wTEMPERATURE(2,24)\r"<br>wait                                                  |
| 326 | Comment             | End of robotic FA assay; samples are ready for GC acquiring data                                                                |
